# Supplementary material
Source: Springer Nature journal article supplement (https://www.springermedizin.de/resource/supplementary/12885_2014_4631_MOESM2_ESM.pdf/9466878)
Supplement: MOESM2 [file 9466878]

Normal colon tissues

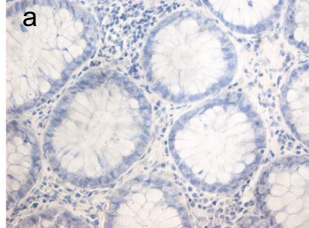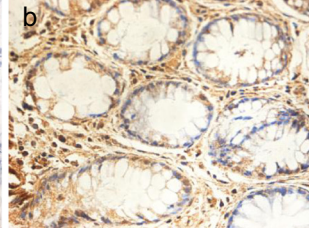

200  $\mu$ m

Colon cancer tissues

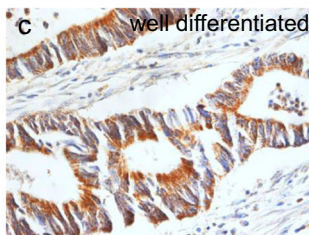

well differentiated

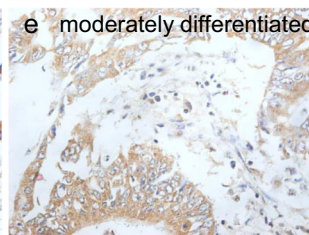

moderately differentiated

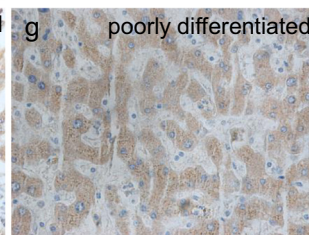

poorly differentiated

Rectal cancer tissues

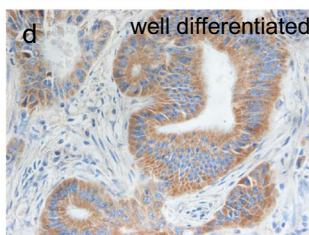

well differentiated

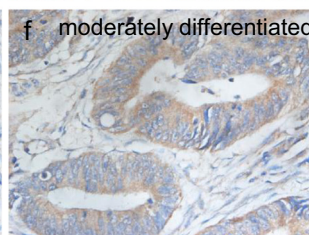

moderately differentiated

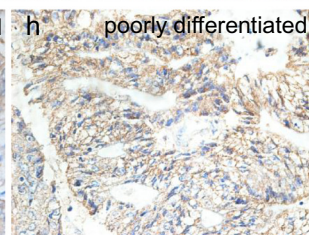

poorly differentiated

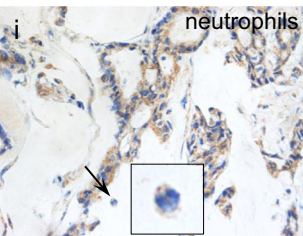

neutrophils

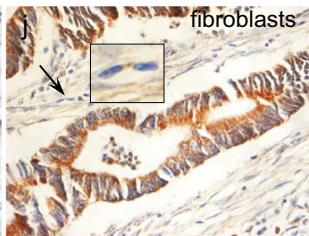

fibroblasts

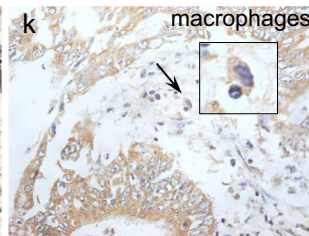

macrophages

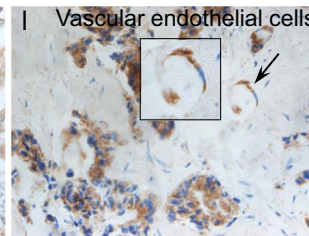

Vascular endothelial cells
